# Supplementary material for: Bodily Maps of Emotion in Major Depressive Disorder
Source: Springer Nature journal article supplement (doi:10.1007/s10608-020-10195-0), 2020-12-28
Supplement: MOESM1 [file 18712416]

Supplementary material

S1: Averaged classification for one hundred 5-fold cross-validations compared to true classes with a maximum of 120 possible correct classifications for healthy controls.

| True Classes | Predicted Classes | | | | | |
| --- | --- | --- | --- | --- | --- | --- |
|  | Anger | Disgust | Happiness | Sadness | Fear | Neutral |
| Anger | 14.42 | 17.51 | 24.26 | 19.17 | 16.72 | 27.92 |
| Disgust | 9.20 | 43.61 | 9.19 | 17.30 | 14.36 | 26.34 |
| Happiness | 11.80 | 7.22 | 44.64 | 22.85 | 13.32 | 20.17 |
| Sadness | 16.34 | 23.01 | 32.16 | 28.43 | 12.17 | 7.89 |
| Fear | 16.53 | 12.67 | 14.72 | 11.71 | 28.81 | 35.56 |
| Neutral | 3.28 | 7.65 | 1.95 | 1.56 | 4.33 | 101.23 |

S2: Averaged classification for one hundred 5-fold cross-validations compared to true classes with a maximum of 120 possible correct classifications for major depressive disorder – non-medicated group.

| True Classes | Predicted Classes | | | | | |
| --- | --- | --- | --- | --- | --- | --- |
|  | Anger | Disgust | Happiness | Sadness | Fear | Neutral |
| Anger | 14.50 | 29.36 | 19.95 | 13.21 | 15.63 | 27.35 |
| Disgust | 20.83 | 48.46 | 7.19 | 9.79 | 10.60 | 23.13 |
| Happiness | 11.43 | 8.33 | 51.54 | 19.33 | 13.82 | 15.55 |
| Sadness | 15.86 | 13.73 | 31.75 | 20.16 | 12.92 | 25.58 |
| Fear | 16.16 | 13.68 | 17.95 | 18.66 | 22.40 | 31.15 |
| Neutral | 6.46 | 9.85 | 5.68 | 4.83 | 5.75 | 87.43 |

S3: Averaged classification for one hundred 5-fold cross-validations compared to true classes with a maximum of 120 possible correct classifications for major depressive disorder – medicated group.

| True Classes | Predicted Classes | | | | | |
| --- | --- | --- | --- | --- | --- | --- |
|  | Anger | Disgust | Happiness | Sadness | Fear | Neutral |
| Anger | 14.83 | 22.17 | 17.20 | 25.56 | 16.47 | 23.77 |
| Disgust | 16.84 | 41.50 | 8.64 | 10.85 | 14.48 | 27.69 |
| Happiness | 12.16 | 8.16 | 52.60 | 22.60 | 10.03 | 14.45 |
| Sadness | 20.48 | 10.60 | 31.94 | 23.41 | 12.02 | 21.55 |
| Fear | 16.74 | 12.19 | 14.12 | 12.62 | 32.25 | 32.08 |
| Neutral | 5.29 | 10.74 | 1.86 | 4.51 | 2.18 | 95.42 |

S4: Averaged classification for one hundred 5-fold cross-validations compared to true classes with a maximum of 120 possible correct classifications for healthy controls, excluding anger.

| True Classes | Predicted Classes | | | | |
| --- | --- | --- | --- | --- | --- |
|  | Disgust | Happiness | Sadness | Fear | Neutral |
| Disgust | 45.87 | 11.34 | 19.35 | 14.32 | 28.94 |
| Happiness | 7.05 | 52.12 | 24.16 | 14.38 | 22.29 |
| Sadness | 23.86 | 38.39 | 31.90 | 16.12 | 9.73 |
| Fear | 14.01 | 19.30 | 14.87 | 34.69 | 37.13 |
| Neutral | 8.52 | 2.53 | 2.98 | 4.66 | 101.31 |

S5: Averaged classification for one hundred 5-fold cross-validations compared to true classes with a maximum of 120 possible correct classifications for major depressive disorder – non-medicated group, excluding anger.

| True Classes | Predicted Classes | | | | |
| --- | --- | --- | --- | --- | --- |
|  | Disgust | Happiness | Sadness | Fear | Neutral |
| Disgust | 59.49 | 8.62 | 12.35 | 12.92 | 26.62 |
| Happiness | 13.81 | 54.71 | 19.20 | 15.73 | 16.55 |
| Sadness | 16.80 | 35.57 | 23.37 | 18.34 | 25.92 |
| Fear | 18.49 | 19.62 | 20.73 | 28.53 | 32.63 |
| Neutral | 12.40 | 5.74 | 6.18 | 6.26 | 89.42 |

S5: Averaged classification for one hundred 5-fold cross-validations compared to true classes with a maximum of 120 possible correct classifications for major depressive disorder – medicated group, excluding anger.

| True Classes | Predicted Classes | | | | |
| --- | --- | --- | --- | --- | --- |
|  | Disgust | Happiness | Sadness | Fear | Neutral |
| Disgust | 46.50 | 10.49 | 16.74 | 16.13 | 30.19 |
| Happiness | 12.17 | 54.79 | 26.87 | 11.02 | 15.15 |
| Sadness | 15.48 | 35.58 | 32.92 | 13.30 | 22.72 |
| Fear | 13.85 | 15.56 | 18.70 | 38.50 | 33.39 |
| Neutral | 12.01 | 1.87 | 4.98 | 2.28 | 98.86 |


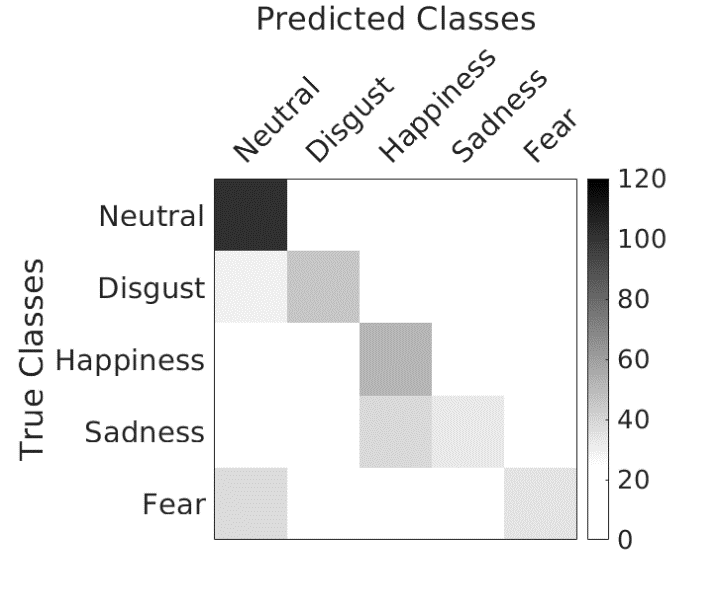


S6: Confusion matrix for cross-validation without anger for healthy controls. White color indicates consistencies under chance level.


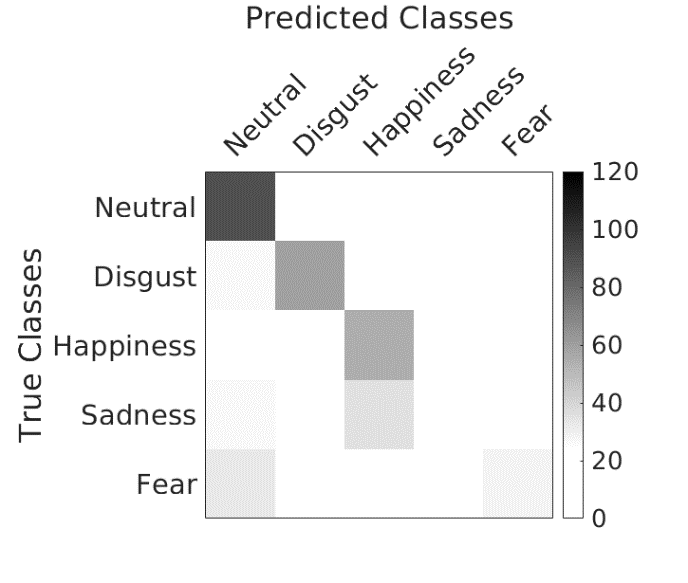


S7: Confusion matrix for cross-validation without anger for major depressive disorder – non-medicated. White color indicates consistencies under chance level.


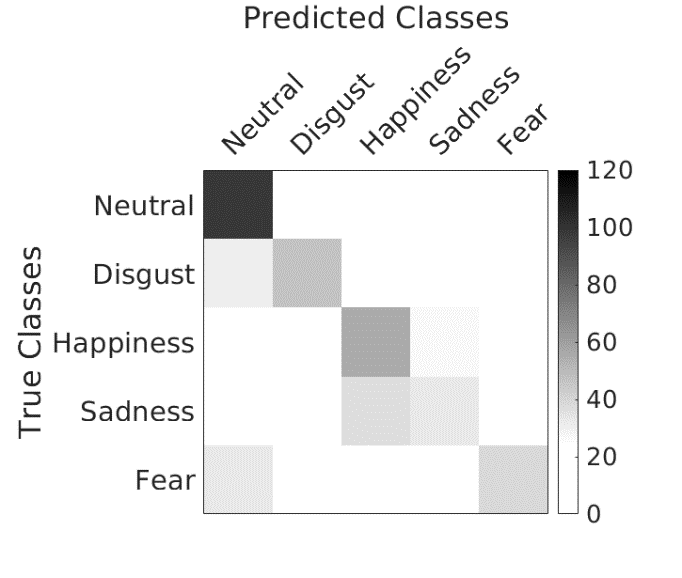


S8: Confusion matrix for cross-validation without anger for major depressive disorder – medicated. White color indicates consistencies under chance level.
